# Supplementary material for: The Potential Role of Wild Suids in African Swine Fever Spread in Asia and the Pacific Region
Source: MDPI journal article supplement (doi:10.3390/v15010061), 2022-12-24

**Supplementary Materials:** The following supporting information can be downloaded at: [www.mdpi.com/xxx/s1](http://www.mdpi.com/xxx/s1), Table S1: Definitions of suid populations used in this report; Table S2: Analysis of the type of farming methods used in Asia and the Pacific reported by WOAHA members; Table S3: Reports to WAHIS of African swine fever in wildlife in Asia, as of 7<sup>th</sup> of August 2022; Questionnaire S1.

Table S1: Definitions of suid populations used in this report

| Suid category           | Definition                                                                                                                                                                                                                                                                                    | Subcategory       | Definition                                                                                                                                                                                                                                                                                                                                                                                                                                                                                 |
|-------------------------|-----------------------------------------------------------------------------------------------------------------------------------------------------------------------------------------------------------------------------------------------------------------------------------------------|-------------------|--------------------------------------------------------------------------------------------------------------------------------------------------------------------------------------------------------------------------------------------------------------------------------------------------------------------------------------------------------------------------------------------------------------------------------------------------------------------------------------------|
| Wild <sup>1</sup> suids | Any members of the taxonomic family Suidae that are living freely in the ecosystem without close human management, or that are held in captivity in zoos or breeding programs.                                                                                                                | <i>Sus scrofa</i> | Feral pigs and wild boar.<br>In general, wild boar are locally endemic and feral pigs have been introduced to an area.<br>The eleven species of endemic pigs found locally across the Asia and the Pacific region ( <i>Babyrussa celebensis</i> , <i>B. babyrussa</i> , <i>B. togeanensis</i> , <i>Sus barbatus</i> , <i>S. verrucosus</i> , <i>S. celebensis</i> , <i>S. philippensis</i> , <i>S. oliveri</i> , <i>S. ahoenobarbus</i> , <i>S. cebifrons</i> , <i>Porcula salvania</i> ). |
|                         |                                                                                                                                                                                                                                                                                               | Other wild suidae | Wild pigs that are hybrids of wild pig species                                                                                                                                                                                                                                                                                                                                                                                                                                             |
|                         | There are two main types of wild suids, (i) <i>Sus scrofa</i> and (ii) other wild Suidae.                                                                                                                                                                                                     | Hybrids           |                                                                                                                                                                                                                                                                                                                                                                                                                                                                                            |
| Domestic pigs           | Any members of the taxonomic family Suidae that are managed by humans, excluding wild pigs held in zoos or breeding programs.<br>Where <i>Sus scrofa</i> are farmed, either intensively or extensively, they are referred to as ‘domestic’ pigs<br>‘Domestic pigs’ includes farmed wild boar. |                   |                                                                                                                                                                                                                                                                                                                                                                                                                                                                                            |

<sup>1</sup> Whilst the term ‘wildlife’ is used in the WOAHA definitions to define feral animals, captive wild animals and wild animals, the term ‘wild suids’ is used for fluency of language.

Table S2: Analysis of the type of farming methods used in Asia and the Pacific reported by WOAHA Members

| Type of domestic pig production in Member | Proportion of Members reporting | Type of domestic production | Number of Members reporting | Mean proportion of production across all Members (95% CI) | Total number of Members reporting each type of small-scale production | Mean proportion of each small-scale production methods across the reporting Members (95% CI) |
|-------------------------------------------|---------------------------------|-----------------------------|-----------------------------|-----------------------------------------------------------|-----------------------------------------------------------------------|----------------------------------------------------------------------------------------------|
| Domestic pig production present           | 72% (18/25)                     | Large Scale                 | 11                          | 48% (21.7-75.1)                                           | ~                                                                     | ~                                                                                            |
|                                           |                                 | Medium scale                | 14                          | 30% (11.5-47.6)                                           | ~                                                                     | ~                                                                                            |
|                                           |                                 | Small scale                 | 15                          | 35% (4.1-65.8)                                            | Free ranging / scavenging (10)                                        | 15% (5.81-24.19)                                                                             |
|                                           |                                 |                             |                             |                                                           | Semi-intensive (13)                                                   | 33% (0.3-65.7)                                                                               |

|                                                   |               |   |   |    |                   |     |
|---------------------------------------------------|---------------|---|---|----|-------------------|-----|
|                                                   |               |   |   |    | 47.5% (20.4-74.6) |     |
|                                                   |               |   |   |    | Intensive (13)    |     |
|                                                   |               |   |   |    |                   | N/A |
|                                                   |               |   |   |    | Integrated (1)    |     |
| No domes-<br>tic pig pro-<br>duction pre-<br>sent | 28%<br>(7/25) | ~ | ~ | NA | ~                 | ~   |

\* Not all Members that specified the type of domestic production system in operation also specified the proportion of the production systems in further detail (percentages). Thus, only those that provided this information were able to be included in this analysis.

Table S3: Reports to WAHIS of African Swine Fever in wildlife in Asia, as of the 7<sup>th</sup> of August 2022 [105]

| Member                          | Semester     | Administrative division | Species               | New out-breaks | Susceptible | Cases | Killed and disposed of | Deaths |
|---------------------------------|--------------|-------------------------|-----------------------|----------------|-------------|-------|------------------------|--------|
| China<br>(People's Republic of) | Jul-Dec 2018 | Heilongjiang            | Wild boar             |                | 375         | 77    | 298                    | 77     |
|                                 | Jan-Jun 2019 | Inner Mongolia          | Wild boar             | 1              | 222         | 222   | 12                     | 210    |
|                                 | Jul-Dec 2018 | Jilin                   | Wild boar             |                |             | 1     | 0                      | 1      |
|                                 | Jul-Dec 2019 | Shaanxi                 | Wild boar             | 1              |             | 9     | 0                      | 9      |
|                                 | Jan-Jun 2020 | Shennongjia             | Wild boar             | 2              |             | 7     |                        | 7      |
| Laos                            | Jul-Dec 2019 | Huaphanh                | Suidae (unidentified) | 2              |             | 6     | 0                      | 6      |
| Malaysia                        | Jan-Jun 2021 | Beluran                 | Wild boar             | 9              | 21          | 43    | 0                      | 43     |
|                                 | Jan-Jun 2022 | Bentong                 | Wild boar             | 1              |             | 1     | -                      | 1      |
|                                 | Jan-Jun 2021 | Kinabatangan            | Wild boar             | 6              | 8           | 10    | 0                      | 10     |
|                                 | Jan-Jun 2021 | Lahad Datu              | Wild boar             | 10             | 12          | 16    | 0                      | 16     |
|                                 | Jan-Jun 2022 | Lipis                   | Wild boar             | 1              |             | 1     | -                      | 1      |
|                                 | Jan-Jun 2021 | Nabawan                 | Wild boar             | 2              | 1           | 2     |                        | 2      |
|                                 | Jan-Jun 2022 | Raub                    | Wild boar             | 2              |             | 3     | -                      | 3      |
|                                 | Jan-Jun 2021 | Sandakan                | Wild boar             | 4              | 7           | 7     | 0                      | 7      |
|                                 | Jan-Jun 2021 | Sandakan                | —                     | 2              | 5           | 5     |                        | 5      |
|                                 | Jul-Dec 2021 | Semporna                | Wild boar             | 1              | 1           | 1     | 0                      | 1      |
|                                 | Jul-Dec 2021 | Semporna                | Bearded pig           | 0              |             | 1     | 0                      | 1      |
|                                 | Jan-Jun 2021 | Tawau                   | Wild boar             | 4              | 2           | 4     | 0                      | 4      |
|                                 | Jul-Dec 2021 | Temerloh                | Wild boar             | 1              |             | 12    | 0                      | 12     |
|                                 | Jul-Dec 2021 | Temerloh                | Bearded pig           | 2              |             | 12    | 0                      | 12     |
|                                 | Jan-Jun 2022 | Temerloh                | Wild boar             | 1              |             | 1     | -                      | 1      |
|                                 | Jan-Jun 2021 | Tongod                  | Wild boar             | 6              | 7           | 14    | 0                      | 14     |
|                                 | Jan-Jun 2022 | Boeun                   | Wild boar             | 5              |             | 67    | 4                      | 63     |
|                                 | Jan-Jun 2021 | Cheorwon                | Wild boar             | 1              |             | 1     | 0                      | 1      |
|                                 | Jan-Jun 2021 | Chuncheon               | Wild boar             | 87             |             | 87    | 0                      | 87     |
|                                 | Jul-Dec 2021 | Chuncheon               | Wild boar             | 9              |             | 31    | 0                      | 26     |
|                                 | Jan-Jun 2022 | Chuncheon               | Wild boar             | 3              |             | 21    | 0                      | 21     |
|                                 | Jan-Jun 2022 | Chungju                 | Wild boar             | 4              |             | 21    | 1                      | 20     |

|                        |              |             |                            |     |   |     |    |     |
|------------------------|--------------|-------------|----------------------------|-----|---|-----|----|-----|
| Korea<br>(Republic of) | Jul-Dec 2021 | Danyang     | Wild boar                  | 71  |   | 71  | 3  | 68  |
|                        | Jan-Jun 2022 | Danyang     | Wild boar                  | 2   |   | 11  | 0  | 11  |
|                        | Jul-Dec 2021 | Donghae     | Wild boar                  | 1   |   | 4   | 1  | 3   |
|                        | Jan-Jun 2022 | Donghae     | Wild boar                  | 2   |   | 4   | 1  | 3   |
|                        | Jan-Jun 2021 | Gangneung   | Wild boar                  | 72  |   | 72  | 44 | 28  |
|                        | Jan-Jun 2022 | Gangneung   | Wild boar                  | 3   |   | 29  | 15 | 14  |
|                        | Jul-Dec 2019 | Gangwon-Do  | Wild boar                  |     |   | 17  | 2  | 15  |
|                        | Jan-Jun 2020 | Gangwon-Do  | Wild boar                  | 265 |   | 269 | 7  | 262 |
|                        | Jul-Dec 2020 | Gangwon-Do  | Wild boar                  | 182 |   | 183 | 14 | 169 |
|                        | Jan-Jun 2021 | Gangwon-Do  | Wild boar                  | 118 |   | 123 | 4  | 119 |
|                        | Jan-Jun 2021 | Gapyeong    | Wild boar                  | 15  |   | 16  | 0  | 16  |
|                        | Jul-Dec 2021 | Gapyeong    | Wild boar                  | 7   |   | 16  | 1  | 0   |
|                        | Jan-Jun 2022 | Gapyeong    | Wild boar                  | 3   |   | 14  | 0  | 14  |
|                        | Jul-Dec 2021 | Goseong     | Wild boar                  | 7   |   | 7   | 1  | 6   |
|                        | Jan-Jun 2022 | Goseong     | Wild boar                  | 1   |   | 1   | 0  | 1   |
|                        | Jul-Dec 2019 | Gyeonggi-Do | Wild boar                  |     |   | 38  | 1  | 37  |
|                        | Jan-Jun 2020 | Gyeonggi-Do | Wild boar                  | 324 |   | 332 | 3  | 329 |
|                        | Jul-Dec 2020 | Gyeonggi-Do | Wild boar                  | 70  |   | 74  | 10 | 64  |
|                        | Jan-Jun 2021 | Gyeonggi-Do | Wild boar                  | 54  |   | 59  | 4  | 55  |
|                        | Jul-Dec 2021 | Hoengseong  | Wild boar                  | 44  |   | 44  |    | 44  |
|                        | Jan-Jun 2022 | Hoengseong  | Wild boar                  | 3   |   | 12  | 0  | 12  |
|                        | Jan-Jun 2021 | Hongcheon   | Wild boar                  | 1   |   | 1   | 0  | 1   |
|                        | Jul-Dec 2021 | Hongcheon   | Wild boar                  | 21  |   | 45  | 12 | 33  |
|                        | Jan-Jun 2022 | Hongcheon   | Wild boar                  | 4   |   | 15  | 2  | 13  |
|                        | Jan-Jun 2021 | Hwacheon    | Suidae (unidenti-<br>fied) | 2   |   | 2   | 0  | 2   |
|                        | Jan-Jun 2021 | Hwacheon    | Wild boar                  | 57  | 2 | 60  | 0  | 60  |
|                        | Jul-Dec 2021 | Hwacheon    | Wild boar                  | 2   |   | 2   | 1  | 1   |
|                        | Jan-Jun 2022 | Hwacheon    | Wild boar                  | 1   |   | 2   | 0  | 2   |
|                        | Jan-Jun 2021 | Inje        | Suidae (unidenti-<br>fied) | 1   |   | 1   | 0  | 1   |
|                        | Jan-Jun 2021 | Inje        | Wild boar                  | 27  |   | 27  | 1  | 26  |
|                        | Jul-Dec 2021 | Inje        | Wild boar                  | 48  |   | 68  | 37 | 31  |
|                        | Jan-Jun 2022 | Inje        | Wild boar                  | 2   |   | 3   | 1  | 2   |

|                        |              |             |                            |     |     |    |     |
|------------------------|--------------|-------------|----------------------------|-----|-----|----|-----|
| Korea<br>(Republic of) | Jul-Dec 2021 | Jecheon     | Wild boar                  | 44  | 44  | 0  | 44  |
|                        | Jan-Jun      | Jecheon     | Wild boar                  | 4   | 22  | 0  | 22  |
|                        | Jul-Dec 2021 | Jeongseon   | Wild boar                  | 139 | 139 | 11 | 128 |
|                        | Jan-Jun 2022 | Jeongseon   | Wild boar                  | 4   | 26  | 0  | 26  |
|                        | Jan-Jun 2022 | Mungyeong   | Wild boar                  | 2   | 2   | 1  | 1   |
|                        | Jan-Jun 2021 | Paju        | Wild boar                  | 2   | 2   | 0  | 2   |
|                        | Jan-Jun 2021 | Pocheon     | Wild boar                  | 40  | 41  | 1  | 40  |
|                        | Jan-Jun 2022 | Pocheon     | Wild boar                  | 1   | 1   | 0  | 1   |
|                        | Jul-Dec 2021 | Pocheon     | Wild boar                  | 4   | 4   | 2  | 2   |
|                        | Jul-Dec 2021 | Pyeongchang | Wild boar                  | 15  | 39  | 5  | 34  |
|                        | Jan-Jun 2022 | Pyeongchang | Wild boar                  | 1   | 1   | 0  | 1   |
|                        | Jul-Dec 2021 | Samcheok    | Wild boar                  | 1   | 288 | 9  | 19  |
|                        | Jan-Jun 2022 | Samcheok    | Wild boar                  | 4   | 30  | 5  | 25  |
|                        | Jan-Jun 2022 | Sangju      | Wild boar                  | 4   | 36  | 0  | 36  |
|                        | Jul-Dec 2021 | Sokcho      | Wild boar                  | 1   | 1   | 0  | 1   |
|                        | Jan-Jun 2022 | Ulsan       | Wild boar                  | 2   | 10  | 0  | 10  |
|                        | Jul-Dec 2021 | Wonju       | Wild boar                  | 1   | 6   | 0  | 6   |
|                        | Jan-Jun 2021 | Yanggu      | Suidae (unidenti-<br>fied) | 1   | 1   | 0  | 1   |
|                        | Jan-Jun 2021 | Yanggu      | Wild boar                  | 33  | 34  | 0  | 34  |
|                        | Jan-Jun 2021 | Yanggu      | —                          | 1   | 1   | 0  | 1   |
|                        | Jul-Dec 2021 | Yanggu      | Wild boar                  | 5   | 5   | 1  | 4   |
|                        | Jan-Jun 2022 | Yanggu      | Wild boar                  | 2   | 2   | 0  | 2   |
|                        | Jan-Jun 2021 | Yangyang    | Wild boar                  | 16  | 26  | 11 | 15  |
|                        | Jan-Jun 2022 | Yangyang    | Wild boar                  | 1   | 1   | 0  | 1   |
|                        | Jan-Jun 2021 | Yeoncheon   | Wild boar                  | 66  | 71  | 0  | 71  |
|                        | Jul-Dec 2021 | Yeoncheon   | Wild boar                  | 1   | 2   | 0  | 2   |
|                        | Jul-Dec 2021 | Yeongwol    | Wild boar                  | 126 | 126 | 3  | 123 |
|                        | Jan-Jun 2022 | Yeongwol    | Wild boar                  | 4   | 50  | 8  | 42  |

Questionnaire S1:

## 1.1 Respondent details

The data from this survey may be used in research and published. If you would like your data to remain unpublished, please specify ('No') below and your information reported will not be included in any publications. Otherwise, tick 'Yes':

| Yes                      | No                       |
|--------------------------|--------------------------|
| <input type="checkbox"/> | <input type="checkbox"/> |

1. Please write your country / territory name:

2. Contact email and name for follow up questions (if you do not require privacy):

3. Please note your organisation

## 1.2 Wild pigs in your country / territory

4. Please indicate the pig species that are present within your country/territory

⇒ If 'No pigs' are present please end survey here, thank you.

| Species                                                     | Tick if present:         |
|-------------------------------------------------------------|--------------------------|
| Wild boar or feral pig ( <i>Sus scrofa</i> )                | <input type="checkbox"/> |
| Sulawesi babirusa ( <i>Babyrusa celebensis</i> )            | <input type="checkbox"/> |
| Hairy babirusa ( <i>Babyrusa babyrussa</i> )                | <input type="checkbox"/> |
| Togian Islands babirusa ( <i>Babyrusa togeanensis</i> )     | <input type="checkbox"/> |
| Bearded pig ( <i>Sus barbatus</i> )                         | <input type="checkbox"/> |
| Javan warty pig, Bawean warty pig ( <i>Sus verrucosus</i> ) | <input type="checkbox"/> |
| Sulawesi warty pig ( <i>Sus celebensis</i> )                | <input type="checkbox"/> |
| Philippine warty pig ( <i>Sus philippensis</i> )            | <input type="checkbox"/> |
| Mindoro (Oliver's) warty pig ( <i>Sus oliveri</i> )         | <input type="checkbox"/> |
| Palawan bearded pig ( <i>Sus ahoenobarbus</i> )             | <input type="checkbox"/> |
| Visayan warty pig ( <i>Sus cebifrons</i> )                  | <input type="checkbox"/> |
| Pygmy hog ( <i>Porcula salvania</i> )                       | <input type="checkbox"/> |
| No pigs                                                     | <input type="checkbox"/> |
| Other (species not listed – please name)                    | <input type="checkbox"/> |

### 5. For the relevant species present in your country / territory, please fill out the corresponding information:

⇒ An example row is presented in the table below for *Sus scrofa* (feral pigs) in Australia for reference. Repeat the information for every species that is present.

| Species (complete for the species present within the country)                  | Has ASF been detected in that species? | Is the species protected for conservation? | Are there conservation breeding efforts? | Minimum density of that species (pigs/square km) | Maximum density of that species (pigs/square km) | Approximate % of country where the species is found |
|--------------------------------------------------------------------------------|----------------------------------------|--------------------------------------------|------------------------------------------|--------------------------------------------------|--------------------------------------------------|-----------------------------------------------------|
| <b>Example row for Wild boar or feral pig (<i>Sus scrofa</i>) in Australia</b> | <b>No</b>                              | <b>No</b>                                  | <b>No</b>                                | <b>0.1 pigs/km<sup>2</sup></b>                   | <b>20 pigs/km<sup>2</sup></b>                    | <b>40%</b>                                          |
| Wild boar or feral pig ( <i>Sus scrofa</i> )                                   |                                        |                                            |                                          |                                                  |                                                  |                                                     |
| Sulawesi babirusa ( <i>Babylousa celebensis</i> )                              |                                        |                                            |                                          |                                                  |                                                  |                                                     |
| Hairy babirusa ( <i>Babylousa babyrussa</i> )                                  |                                        |                                            |                                          |                                                  |                                                  |                                                     |
| Togian Islands babirusa ( <i>Babylousa togeanensis</i> )                       |                                        |                                            |                                          |                                                  |                                                  |                                                     |
| Bearded pig ( <i>Sus barbatus</i> )                                            |                                        |                                            |                                          |                                                  |                                                  |                                                     |
| Javan warty pig, Bawean warty pig ( <i>Sus verrucosus</i> )                    |                                        |                                            |                                          |                                                  |                                                  |                                                     |
| Sulawesi warty pig ( <i>Sus celebensis</i> )                                   |                                        |                                            |                                          |                                                  |                                                  |                                                     |
| Philippine warty pig ( <i>Sus philippensis</i> )                               |                                        |                                            |                                          |                                                  |                                                  |                                                     |
| Mindoro (Oliver's) warty pig ( <i>Sus oliveri</i> )                            |                                        |                                            |                                          |                                                  |                                                  |                                                     |
| Palawan bearded pig ( <i>Sus ahoenobarbus</i> )                                |                                        |                                            |                                          |                                                  |                                                  |                                                     |

|                                                                 |  |  |  |  |  |  |
|-----------------------------------------------------------------|--|--|--|--|--|--|
| Visayan warty pig ( <i>Sus cebifrons</i> )                      |  |  |  |  |  |  |
| Pygmy hog ( <i>Porcula salvania</i> )                           |  |  |  |  |  |  |
| Other (species not listed – please name and complete the table) |  |  |  |  |  |  |



**6. Where are wild *Sus scrofa* or other endemic Suidae found in your country / territory?**

| Locations wild pigs can be found:                  | Tick if relevant | Species |
|----------------------------------------------------|------------------|---------|
| Natural areas (e.g. National parks)                |                  |         |
| Agricultural areas (e.g. farming/crops/live-stock) |                  |         |
| Semi-rural (e.g. villages)                         |                  |         |
| Urbanised areas (e.g main towns/city areas)        |                  |         |
| Other instances (specify below):                   |                  |         |

If other instances, please specify below:

## 1.3 Farming domestic pigs and harvesting wild pigs

7. Are domestic pigs (*Sus scrofa*) farmed within your country / territory? (If 'No', go to Q8).

| Yes | No | Unsure |
|-----|----|--------|
|     |    |        |

(i) If yes, please indicate the type of farming methods conducted within your country / territory:

| Farming method                                            | Tick if relevant | Approximate proportion of national production from each category (%) |
|-----------------------------------------------------------|------------------|----------------------------------------------------------------------|
| Large scale production (>500 sows or >4000 fatteners)     |                  |                                                                      |
| Medium scale production (5-500 sows or 20-4000 fatteners) |                  |                                                                      |
| Small scale production (1-2 sows or 1-20 fatteners)       |                  |                                                                      |
| ⇒ Free range/scavenging (unrestrained)                    |                  |                                                                      |
| ⇒ Semi-intensive (confined within large area)             |                  |                                                                      |
| ⇒ Intensive (confined to a pig pen)                       |                  |                                                                      |
| ⇒ Integrated (with fish farming)                          |                  |                                                                      |
| ⇒ Other (specify below)                                   |                  |                                                                      |

If other methods, please explain in further detail:

8. Do parts of the human population in your country / territory use wild pigs for specific purposes (e.g. hunt for cultural or dietary)? (If 'No', go to Q9).

| Y | N | Unsure |
|---|---|--------|
|   |   |        |

(i) If yes, please indicate the purposes for wild pig use:

| Wild pig use                        | Tick if relevant | Relevant species: |
|-------------------------------------|------------------|-------------------|
| Food (diet / consumption)           |                  |                   |
| Food (ceremonial occasions)         |                  |                   |
| Hunting/sport                       |                  |                   |
| Feed for farm animals               |                  |                   |
| Dowries                             |                  |                   |
| Hierarchy ranking                   |                  |                   |
| Rituals (sacrifice, worship, taboo) |                  |                   |
| Payment / monetary reasons          |                  |                   |
| Other (specify below)               |                  |                   |

If other purposes, please explain in further detail:

## 1.4 Transmission of ASF in domestic and wild pigs

9. Has ASF transmitted between wild pigs and domestic pigs in your country / territory? (If 'No', go to Q11).

| Y | N | Unsure |
|---|---|--------|
|   |   |        |

- (i) If yes, has this transmission been between:

| <b>Sus scrofa</b>                      | Tick if relevant |  |
|----------------------------------------|------------------|--|
| Domestic pigs to wild pigs             |                  |  |
| Wild pigs to wild pigs                 |                  |  |
| Wild pigs to domestic pigs             |                  |  |
| Unsure                                 |                  |  |
| <b>Other wild pigs</b>                 | Species relevant |  |
| Domestic pigs to other wild suidae     |                  |  |
| Other wild suidae to other wild suidae |                  |  |
| Other wild suidae to Domestic pigs     |                  |  |
| Unsure                                 |                  |  |

- (ii) If transmission is occurring, how it occurring at the wild pig and domestic interface?

| Transmission                                              | Tick if relevant  |                                                            |  |
|-----------------------------------------------------------|-------------------|------------------------------------------------------------|--|
|                                                           | <i>Sus scrofa</i> | Other wild pigs (specify species to the right if relevant) |  |
| Direct contact (pig-to-pig)                               |                   |                                                            |  |
| Direct contact with dead pig carcasses                    |                   |                                                            |  |
| Scavenging of food/waste from domestic pig farms          |                   |                                                            |  |
| Indirect contact (i.e. via human interactions or fomites) |                   |                                                            |  |

|                                                |  |  |  |
|------------------------------------------------|--|--|--|
| Spread via effluent from domestic pig-<br>gery |  |  |  |
| Spread via pig products (e.g. pork)            |  |  |  |
| Vectors (if present)                           |  |  |  |
| Other (specify below):                         |  |  |  |

If 'other' transmission pathways present, please explain in further detail below:

**10. Do you have any suggestions on how this transmission could be better controlled?**

## 1.5 Control of ASF in wild pigs.

11. Are there any control or prevention strategies currently being used for ASF in wild pigs in your country / territory? (If 'No', go to Q12).

| Y | N | Unsure |
|---|---|--------|
|   |   |        |

(i) If yes, please indicate the control measures for ASF that are used in wild pigs, noting if they are successful:

| Control / prevention strategy                                                                                                                                                                                                                                                                                             | Tick if relevant | Species | Successful (Y or N) | If unsuccessful, specify why: |
|---------------------------------------------------------------------------------------------------------------------------------------------------------------------------------------------------------------------------------------------------------------------------------------------------------------------------|------------------|---------|---------------------|-------------------------------|
| Fencing                                                                                                                                                                                                                                                                                                                   |                  |         |                     |                               |
| Zoning*                                                                                                                                                                                                                                                                                                                   |                  |         |                     |                               |
| Biosecurity*                                                                                                                                                                                                                                                                                                              |                  |         |                     |                               |
| Surveillance                                                                                                                                                                                                                                                                                                              |                  |         |                     |                               |
| Carcass disposal                                                                                                                                                                                                                                                                                                          |                  |         |                     |                               |
| Vector control                                                                                                                                                                                                                                                                                                            |                  |         |                     |                               |
| Culling/population control                                                                                                                                                                                                                                                                                                |                  |         |                     |                               |
| Border quarantine                                                                                                                                                                                                                                                                                                         |                  |         |                     |                               |
| Other (specify below)                                                                                                                                                                                                                                                                                                     |                  |         |                     |                               |
| <p>* Zoning: identifying geographical areas/boundaries where specific control strategies (i.e., culling within a certain area) are to be carried out.</p> <p>* Biosecurity: implementation of specific strategies within countries to eliminate/reduce the incursion of the disease (i.e., strict import conditions).</p> |                  |         |                     |                               |

If other strategies used, please explain in further detail below:

(ii) If culling or population control is conducted, how is this performed and which species are targeted?

| Culling method                              | Y | Species (specify target species) | N |
|---------------------------------------------|---|----------------------------------|---|
| ⇒ Shooting on the ground (e.g., hunting)    |   |                                  |   |
| ⇒ Aerial shooting (e.g., from a helicopter) |   |                                  |   |
| ⇒ Trapping                                  |   |                                  |   |
| ⇒ Poison baiting                            |   |                                  |   |
| ⇒ Snaring                                   |   |                                  |   |
| ⇒ Fertility control                         |   |                                  |   |
| ⇒ Other (please specify):                   |   |                                  |   |

(iii) If surveillance is conducted, please indicate the strategies used:

| Surveillance strategy                             | Y | Species (specify target species) | N |
|---------------------------------------------------|---|----------------------------------|---|
| ⇒ Pig carcass searching                           |   |                                  |   |
| ⇒ Random / frequent testing of wild pig           |   |                                  |   |
| ⇒ Looking for signs of pig mortality or morbidity |   |                                  |   |
| ⇒ Other (please specify):                         |   |                                  |   |

12. Do you have a managed hunting system or season for wild pigs within your country / territory? (If 'No', go to Q13).

| Yes | No | Unsure |
|-----|----|--------|
|     |    |        |

(i) Please indicate the strategies that are relevant:

| Pig management strategies                                              | Yes | No | Unsure |
|------------------------------------------------------------------------|-----|----|--------|
| A specific hunting period                                              |     |    |        |
| Pigs hunted for game                                                   |     |    |        |
| Pigs hunted for food                                                   |     |    |        |
| There is a quota/limit when hunting                                    |     |    |        |
| There is a target species or demographic of pig hunted (e.g., females) |     |    |        |
| Does illegal hunting occur?                                            |     |    |        |
| Other (please specify below)                                           |     |    |        |

Please explain in further detail below any additional information on management strategies:

(ii) Please indicate reasons for wild pig management:

| Reasons for wild pig management:          | Yes | No | Unsure |
|-------------------------------------------|-----|----|--------|
| Prevention of crop damage by wild pigs    |     |    |        |
| Prevention of potential traffic incidents |     |    |        |
| Prevention of invasion to urban areas     |     |    |        |
| Disease control                           |     |    |        |
| Other (please specify below)              |     |    |        |

52

53

54

55

56

57

58

59

60



Please explain in further detail below any additional information on management strategies:

61

62

63

64

65

66

67

68

69

70

71

72

73

## 1.6 Maintenance of ASF in wild pigs in your country / territory (if absent, go to Q17)

### 13. How long has ASF been in wild *Sus scrofa* populations?

⇒ Write the number of months (e.g. 6 means it has been present in wild pigs for 6 months)

### 14. Do you consider wild *Sus scrofa* to be epidemiologically important in outbreaks in domestic pigs?

| Yes | No | Unsure |
|-----|----|--------|
|     |    |        |

### 15. How long has ASF been in other species of wild SUIDAE?

⇒ Write the number of months (e.g. 6 means it has been present in **other species of wild SUIDAE** for 6

months)

### 16. Do you consider other species of wild SUIDAE to be epidemiologically important in outbreaks in domestic pigs?

| Yes | Species | No | Unsure |
|-----|---------|----|--------|
|     |         |    |        |

## 1.7 Regulations / legislations

### 17. Do you have regulations or legislation to:

- (i) Protect wild pigs for conservation reasons?

| Yes (specify below) | No | Unsure |
|---------------------|----|--------|
|                     |    |        |

- (ii) Control ASF in wild pigs?

| Yes (specify below) | No | Unsure |
|---------------------|----|--------|
|                     |    |        |

- (iii) Regulate hunting in wild pigs?

| Yes (specify below) | No | Unsure |
|---------------------|----|--------|
|                     |    |        |

### 18. If relevant, please specify any additional laws or regulations associated with wild pigs and/or domestic pigs for ASF prevention:

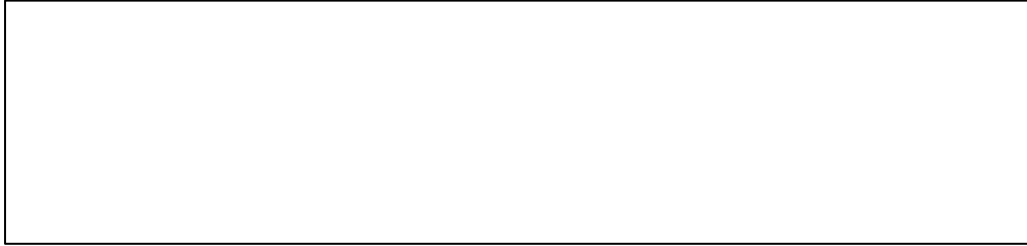

Supplement: s1 [file s1]
